# Supplementary material
Source: publisher site journal article supplement (https://www.dovepress.com/article/278913)
Supplement: Supplementary file 1 [file get_supplementary_file.php]

**Supplementary Fig. 1**

**
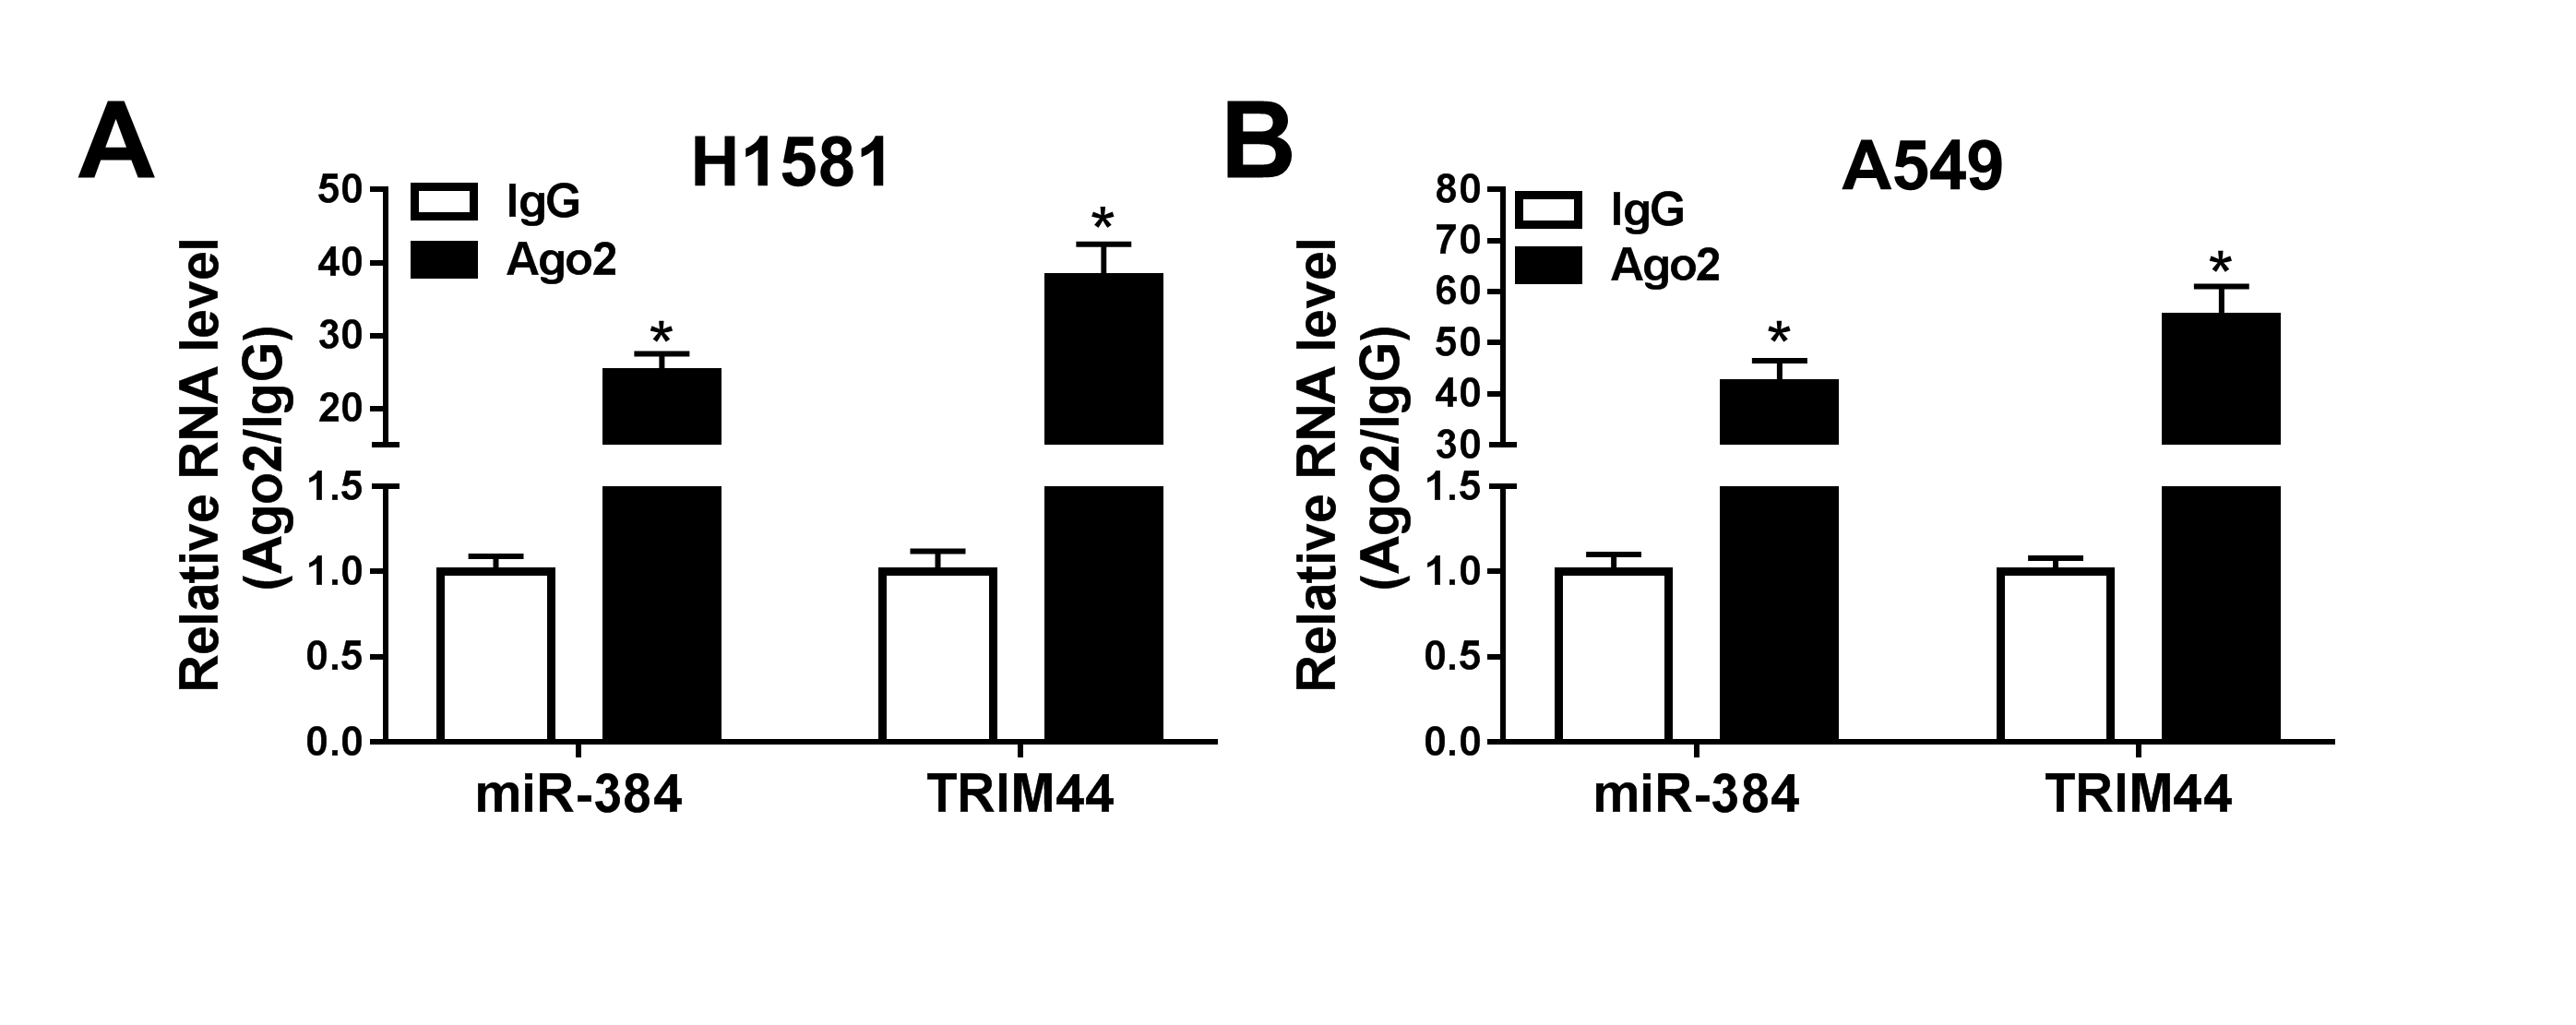
**

**Supplementary Fig. 1 The interaction between miR-384 and TRIM44.** (A and B) RIP assay in NSCLC cells using IgG antibody or Ago2 antibody. **P* < 0.05.

**Supplementary Fig. 2**


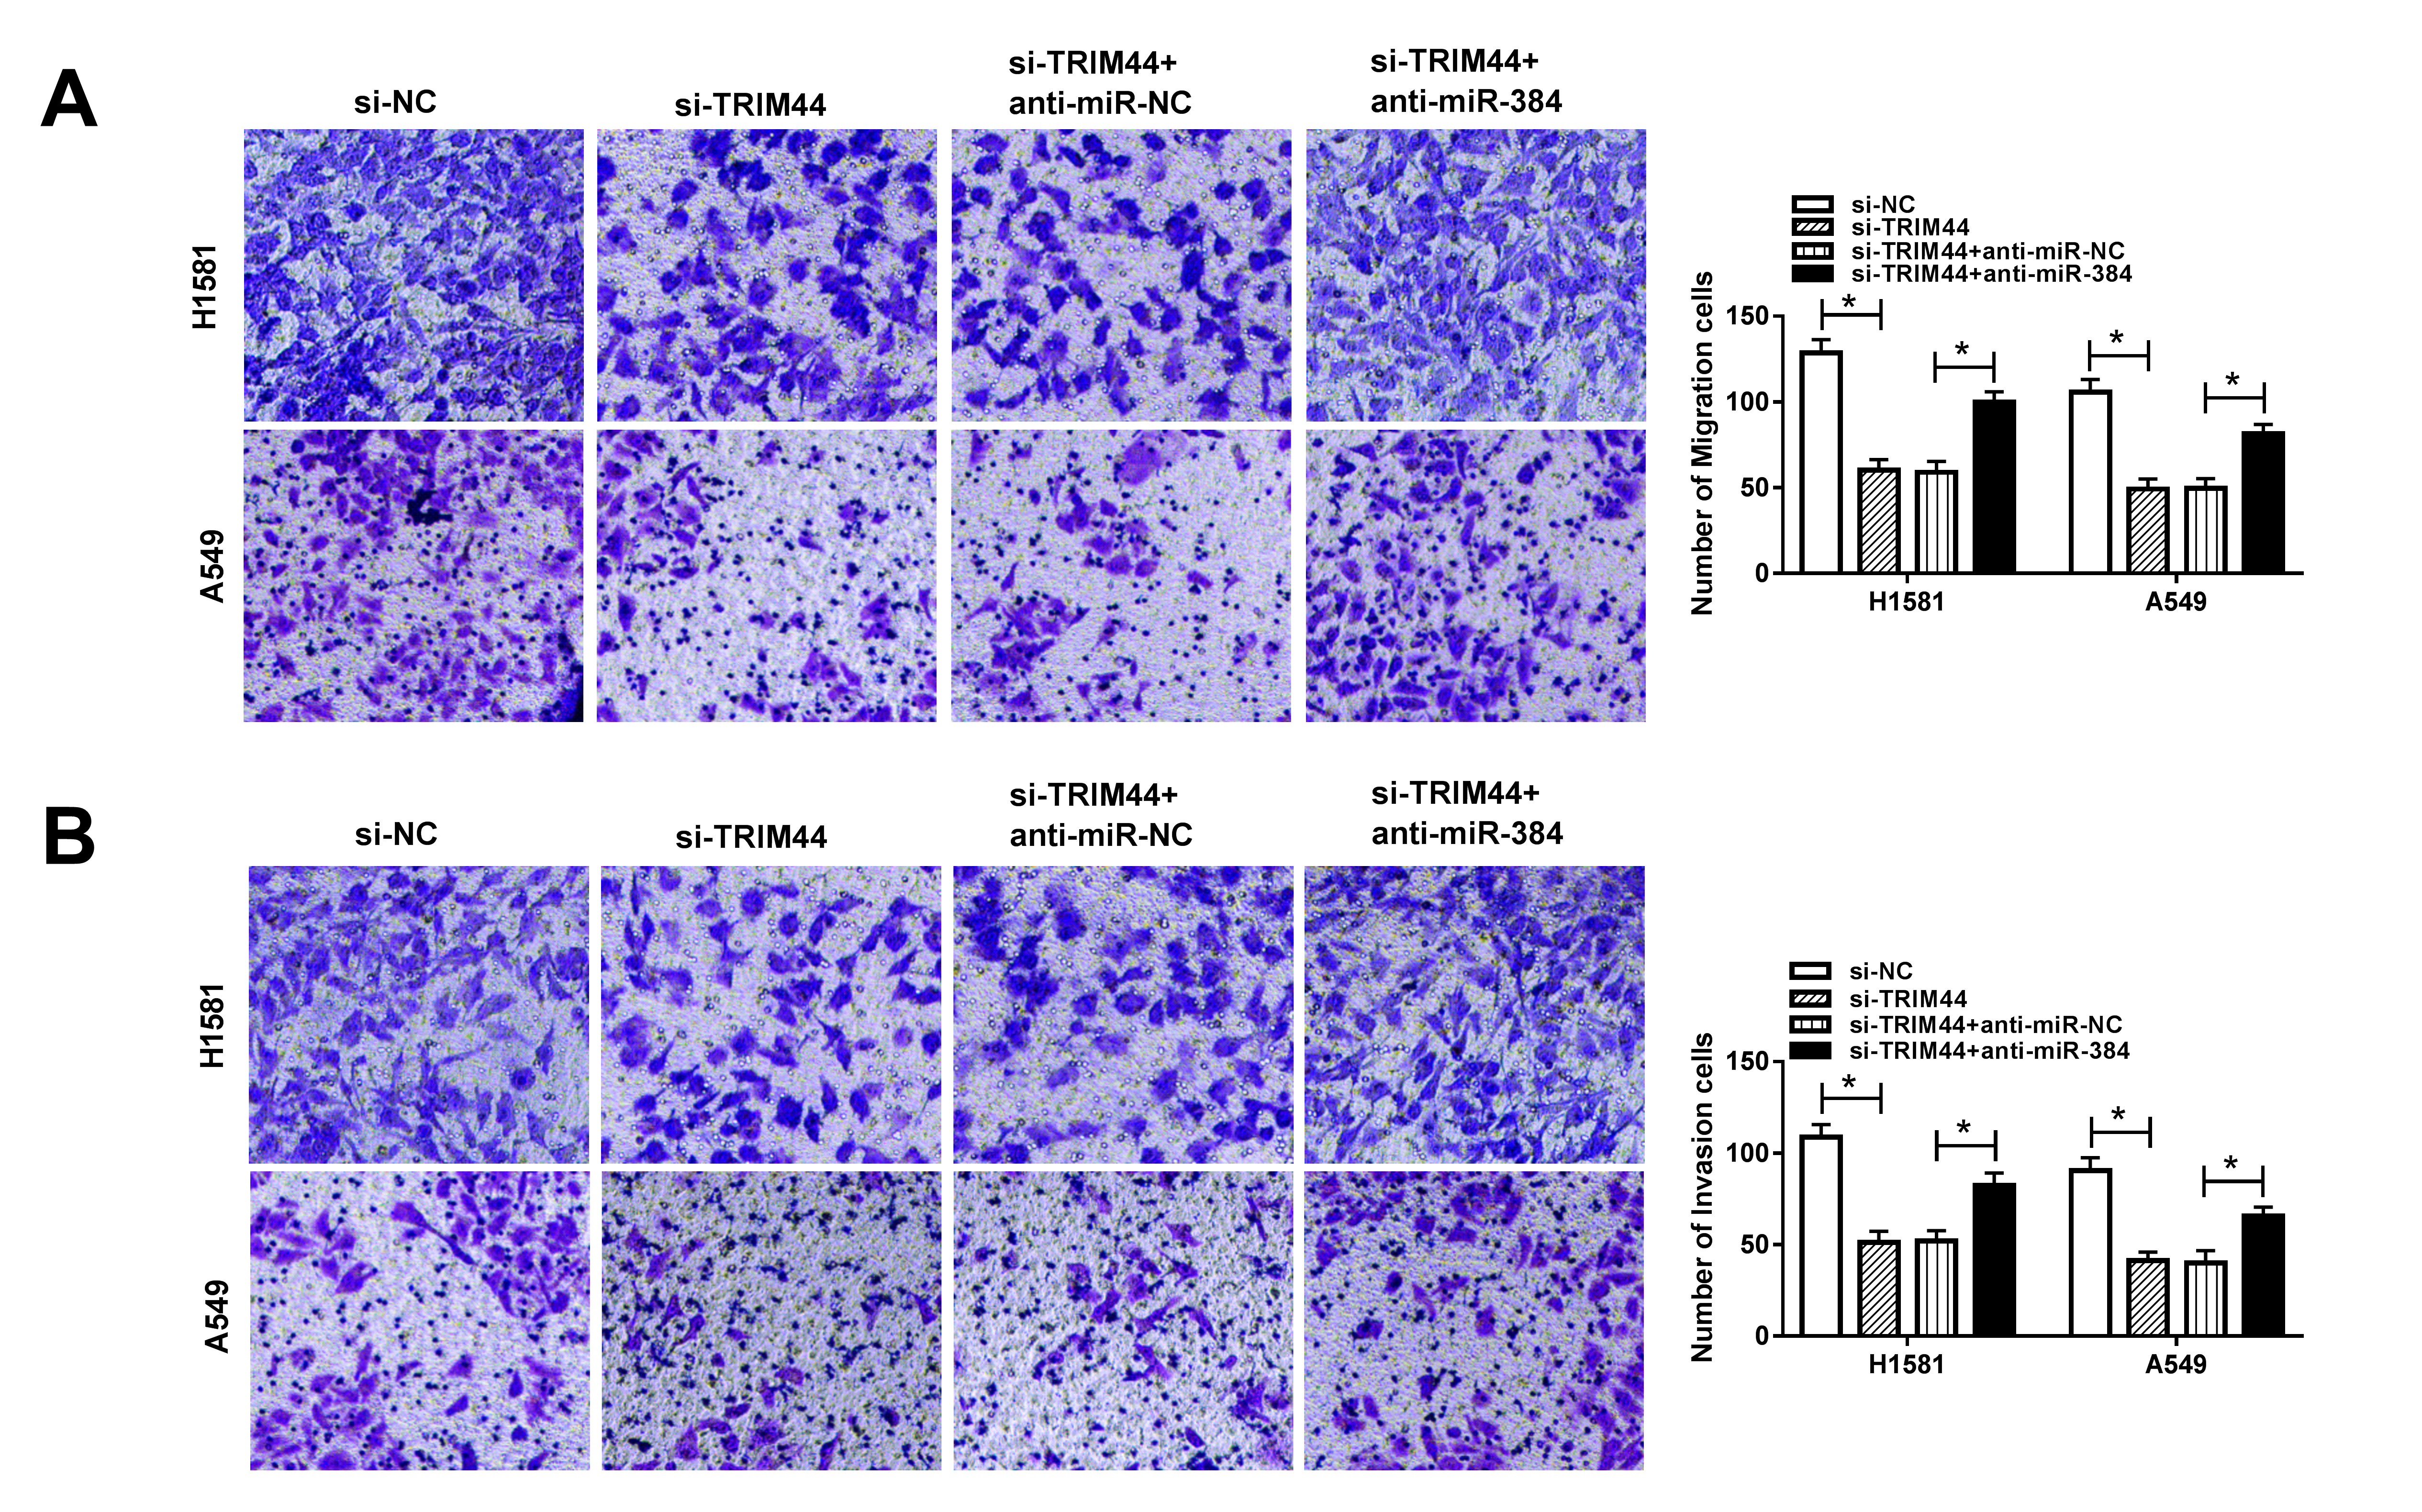


**Supplementary Fig. 2 The migration and invasion ability of NSCLC cells.** (A and B) A549 and H1681 cells were transfected with si-NC, si-TRIM44, si-TRIM44 + anti-miR-NC, or si-TRIM44 + anti-miR-384. Transwell assay was performed to detect the migration and invasion ability. **P* < 0.05.
